# Supplementary material
Source: PubMed Central journal article supplement (PMC5336479)

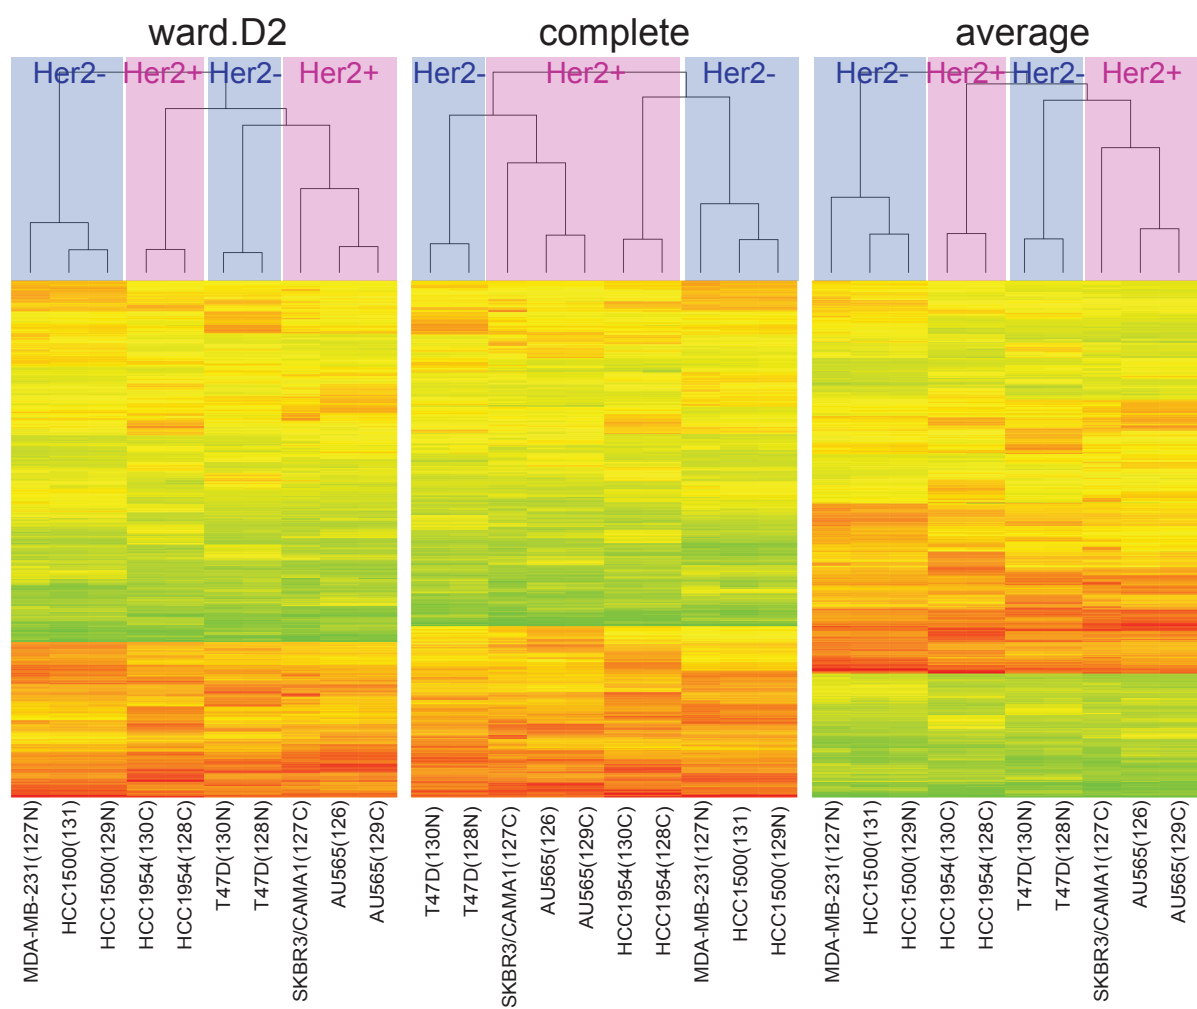

Figure S1

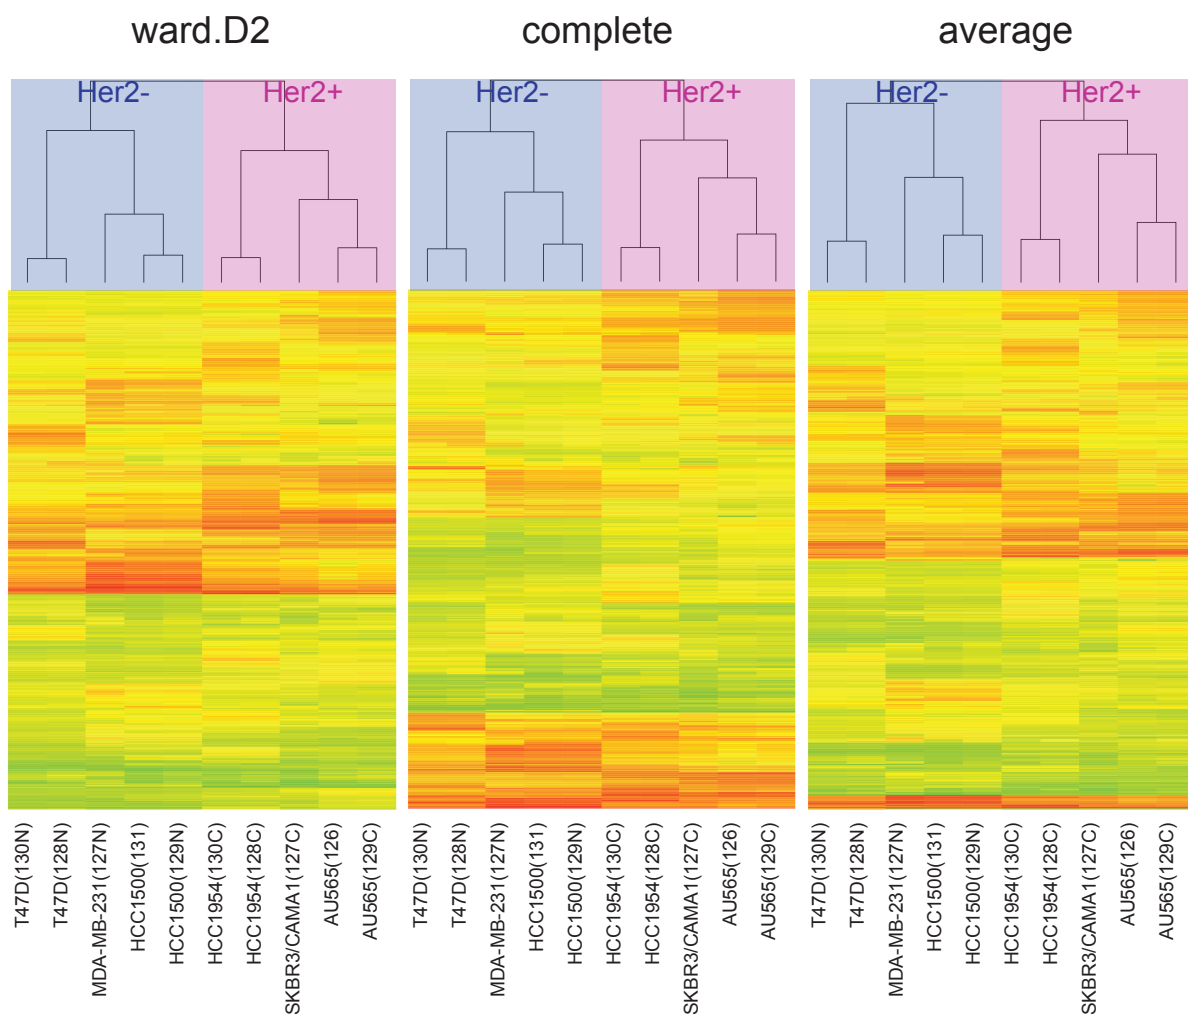

Figure S2

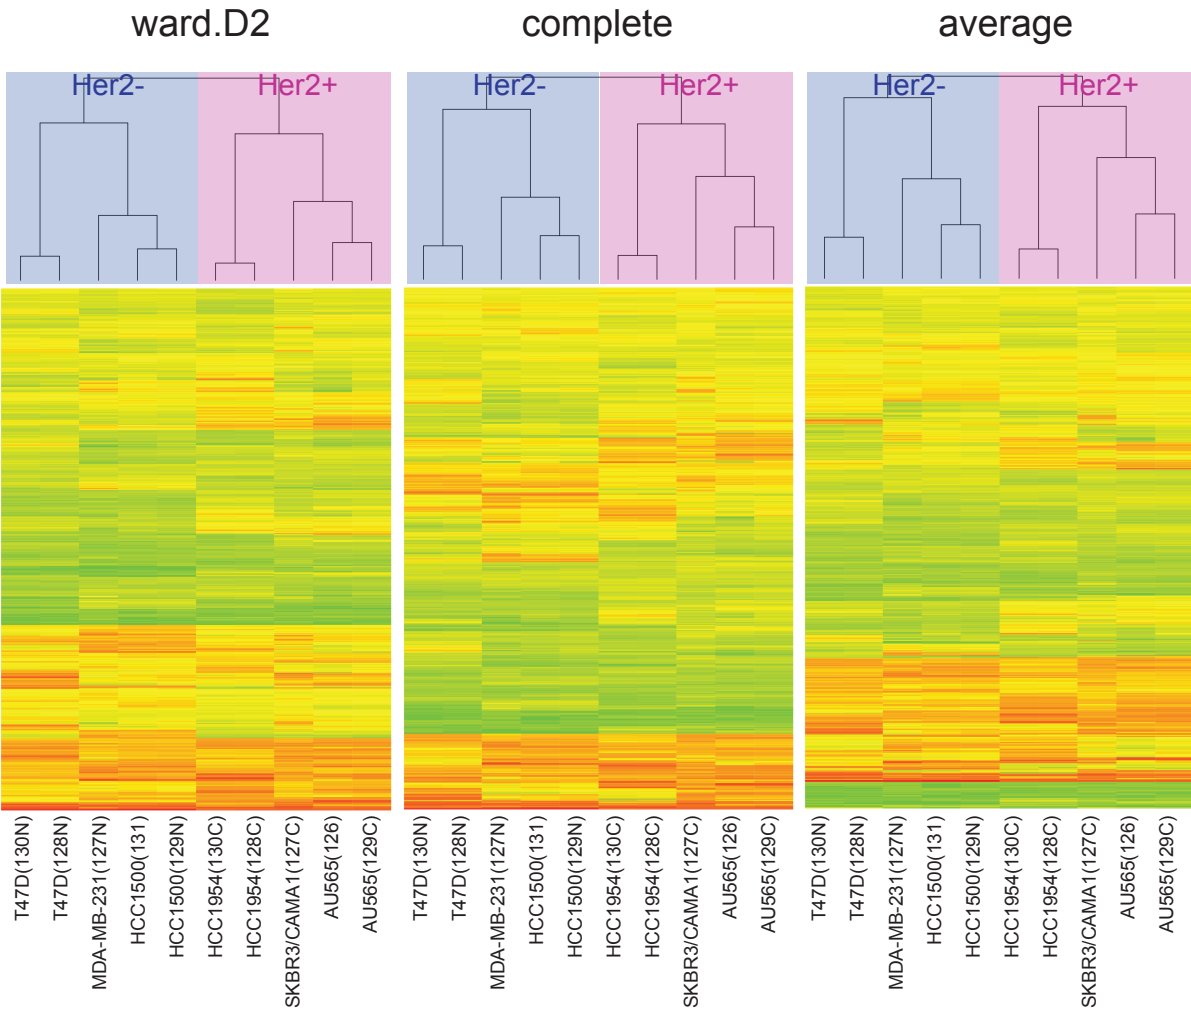

Figure S3

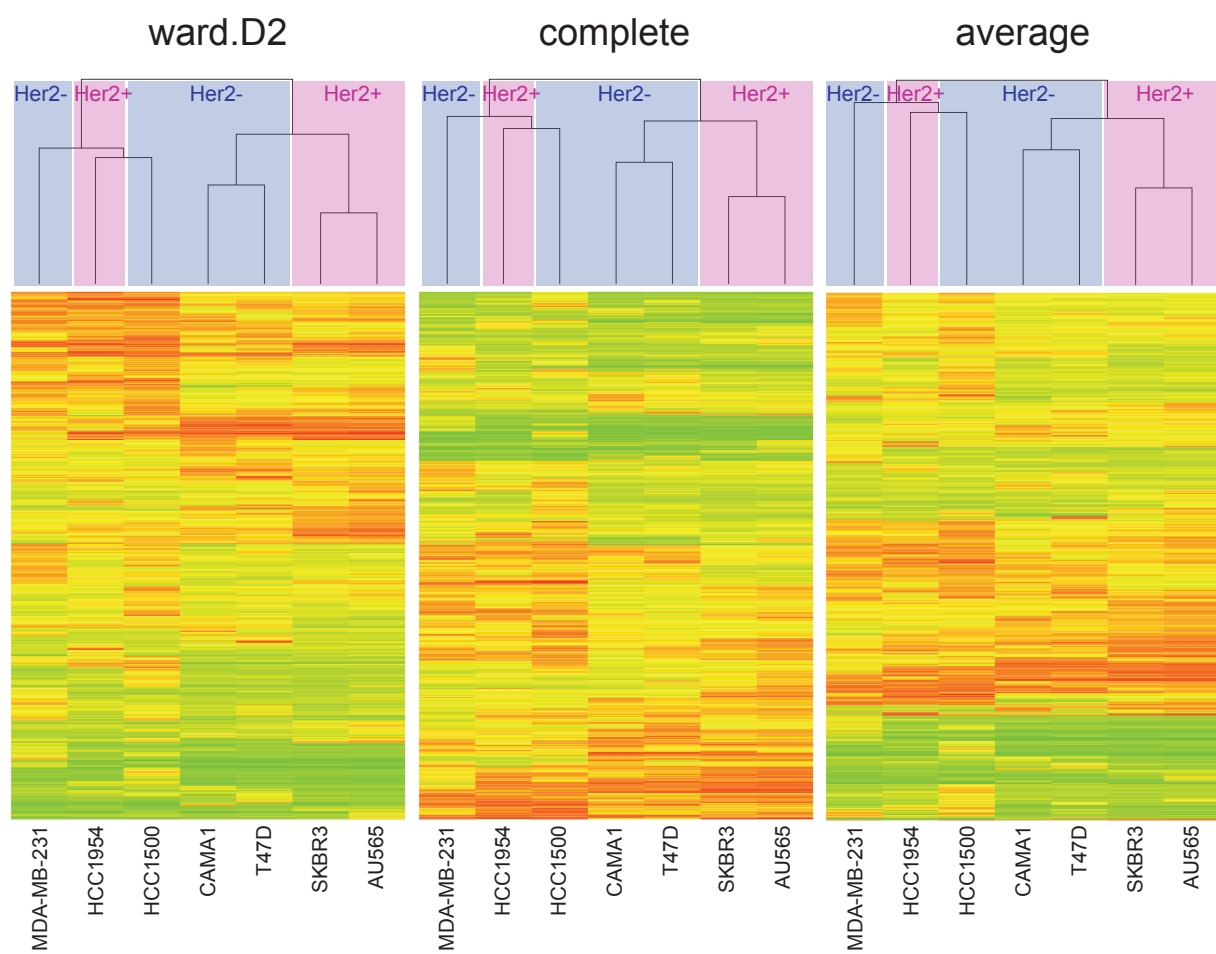

Figure S4

Supplement: NIHMS845175-supplement-Supplemental_Figures.pdf [file NIHMS845175-supplement-Supplemental_Figures.pdf]
